# Supplementary material
Source: publisher figshare collection journal article supplement (https://future-science-group.figshare.com/ndownloader/files/34463759)
Supplement: Supplementary file 1 [file 34463759]

**Supplemental Figure 1. Overall survival in matched cohorts, 1:2 matching.**

**HR (95% CI): 0.75 (0.44-1.25)**

**Supplemental Figure 2. Overall survival in weighted cohorts.**

**HR (95% CI): 0.85 (0.55-1.30)**
